# Supplementary material for: Biophysical characterization of the b-HLH-LZ of ΔMax, an alternatively spliced isoform of Max found in tumor cells: Towards the validation of a tumor suppressor role for the Max homodimers
Source: PubMed Central journal article supplement (PMC5370111; doi:10.1371/journal.pone.0174413), 2017-03-28
Supplement: pone.0174413.s001.pdf [file pone.0174413.s001.pdf]

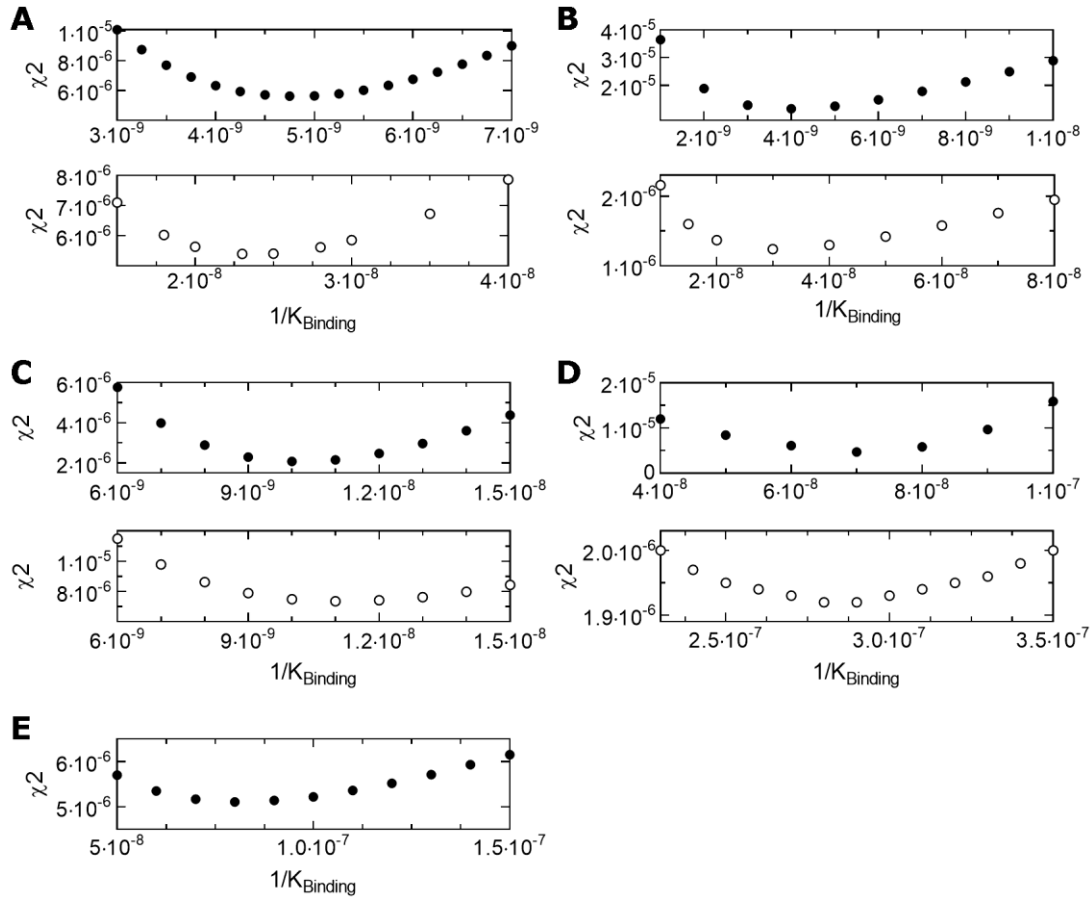

**S1 Fig.  $\chi^2$  of the fits.** Obtained as a function of varying  $1/K_{\text{Binding}}$  for the E-box (black circles) and non-specific (open circles) sequences for (A) Max\*, (B)  $\Delta\text{Max}^*/\text{Max}^*$ , (C) c-Myc\*/ $\Delta\text{Max}^*$ , (D) c-Myc\* and (E)  $\Delta\text{Max}^*$ . The  $1/K_{\text{Dimer}}$  corresponding to the best fit is reported in Table 1.
