# Supplementary material for: Biophysical characterization of the b-HLH-LZ of ΔMax, an alternatively spliced isoform of Max found in tumor cells: Towards the validation of a tumor suppressor role for the Max homodimers
Source: PubMed Central journal article supplement (PMC5370111; doi:10.1371/journal.pone.0174413), 2017-03-28
Supplement: pone.0174413.s002.pdf [file pone.0174413.s002.pdf]

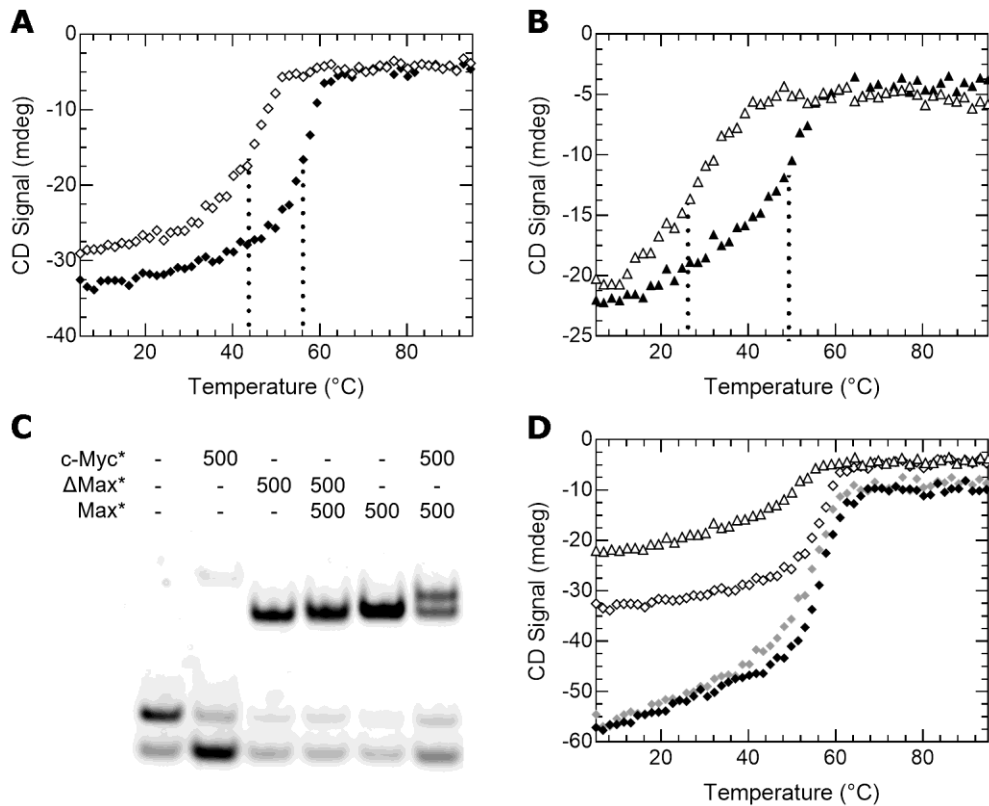

**S2 Fig. Max\* and  $\Delta$ Max\* binds to DNA as homo- and heterodimers.** (A) Thermal denaturation of Max\* in presence of E-box (black diamonds) and non-specific DNA (open diamonds) recorded by monitoring the CD signal at 222 nm. (B) Thermal denaturation of  $\Delta$ Max\* in presence of E-box (black triangles) and non-specific DNA (open triangles) recorded by monitoring the CD signal at 222 nm. (C) EMSA demonstrating that the migration of a fluorescently labeled E-box (250 nM) is retarded by the binding of c-Myc\*,  $\Delta$ Max\*,  $\Delta$ Max\*/Max\*, Max\* and c-Myc\*/Max\* homodimeric and heterodimeric complexes. The protein concentration is indicated in nM. (D) Thermal denaturation of  $\Delta$ Max\*/E-box (open triangles), Max\*/E-box (open diamonds) and  $\Delta$ Max\*/Max\*/E-box (black diamonds) recorded by monitoring the CD signal at 222 nm and the arithmetic sum of the individual denaturations (gray diamonds). Note the presence of only one transition for the case of the mixture of  $\Delta$ Max\*/Max demonstrating that one (heterodimeric) complex is formed in the presence of DNA.
