# Supplementary material for: Biophysical characterization of the b-HLH-LZ of ΔMax, an alternatively spliced isoform of Max found in tumor cells: Towards the validation of a tumor suppressor role for the Max homodimers
Source: PubMed Central journal article supplement (PMC5370111; doi:10.1371/journal.pone.0174413), 2017-03-28
Supplement: pone.0174413.s003.pdf [file pone.0174413.s003.pdf]

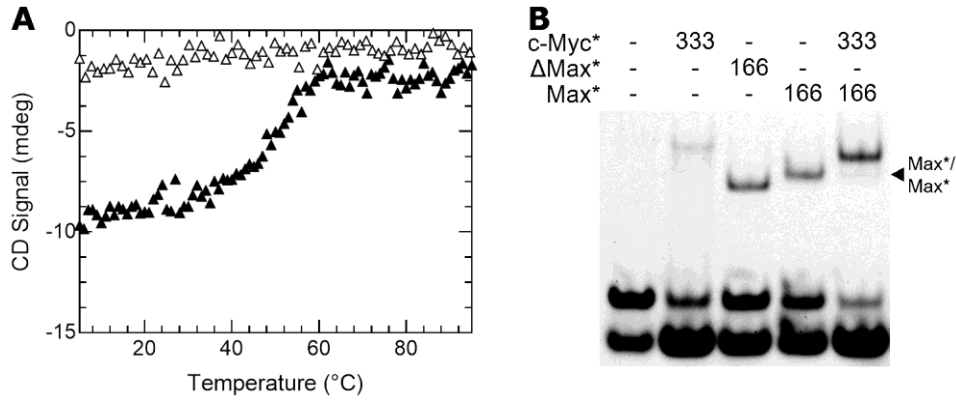

**S3 Fig. c-Myc\* binds E-box sequences as a homodimer.** (A) Thermal denaturation of c-Myc\* in presence of E-box (black triangles) and non-specific DNA (open triangles) recorded by monitoring the CD signal at 222 nm. (B) EMSA demonstrating that the migration of a fluorescently labeled E-box (250 nM) is retarded by the binding of a mixture of Max\*/Max\* and c-Myc\*/Max\* when c-Myc\* is in a 2:1 excess with Max\*. The protein concentration is indicated in nM.
