# Supplementary material for: Biophysical characterization of the b-HLH-LZ of ΔMax, an alternatively spliced isoform of Max found in tumor cells: Towards the validation of a tumor suppressor role for the Max homodimers
Source: PubMed Central journal article supplement (PMC5370111; doi:10.1371/journal.pone.0174413), 2017-03-28
Supplement: pone.0174413.s004.pdf [file pone.0174413.s004.pdf]

**S1 Text. Simulation details of the temperature denaturation curve of the c-Myc\*/ΔMax\* heterodimer.**

The curve was simulated with the model of a dimer dissociating into two unfolded monomers as described in [23]. The enthalpy at  $T^\circ$  ( $304.9 \text{ K} \pm 0.3 \text{ K}$ ),  $\Delta H_u^\circ(T^\circ)$  was found to be  $69.5 \text{ kcal}\cdot\text{mol}^{-1} \pm 3 \text{ kcal}\cdot\text{mol}^{-1}$ . A  $\Delta C_{p,u}^\circ$  of  $0.5 \text{ kcal}\cdot\text{mol}^{-1}\cdot\text{K}^{-1}$  was used in the procedure.  $1/K_{\text{Dimer}}$  ( $20^\circ\text{C}$ ) and ( $37^\circ\text{C}$ ) values of  $4.9 \cdot 10^{-7}$  and  $1.6 \cdot 10^{-4}$ , respectively, were calculated from the stability curves ( $\Delta G_u^\circ(T)$ ) as described in [25].
